# Supplementary material
Source: Springer Nature journal article supplement (https://www.springermedizin.de/resource/supplementary/12986_2010_316_MOESM3_ESM.pdf/25655816)

A (LPS-challenge)

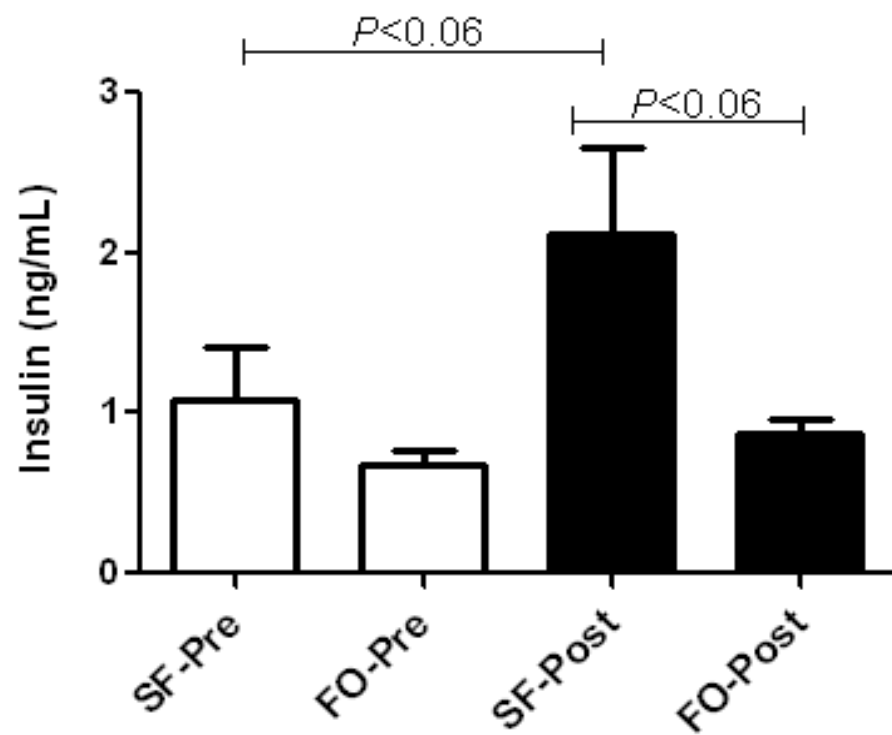

B (LPS-challenge)

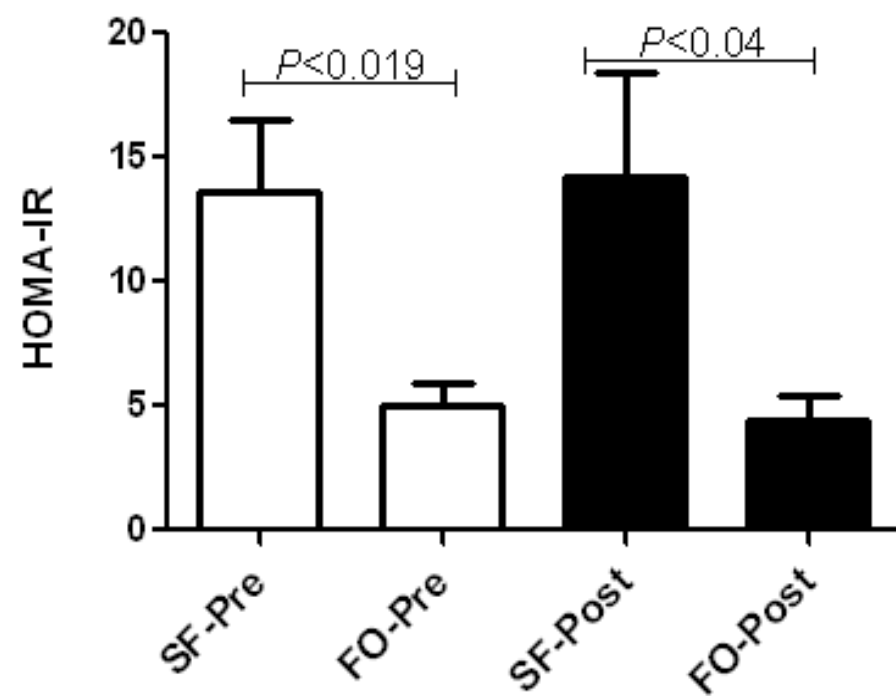

Supplement: MOESM3 [file 25655816]
